# Supplementary material
Source: Springer Nature journal article supplement (https://www.springermedizin.de/resource/supplementary/12913_2010_1266_MOESM4_ESM.pdf/9527728)

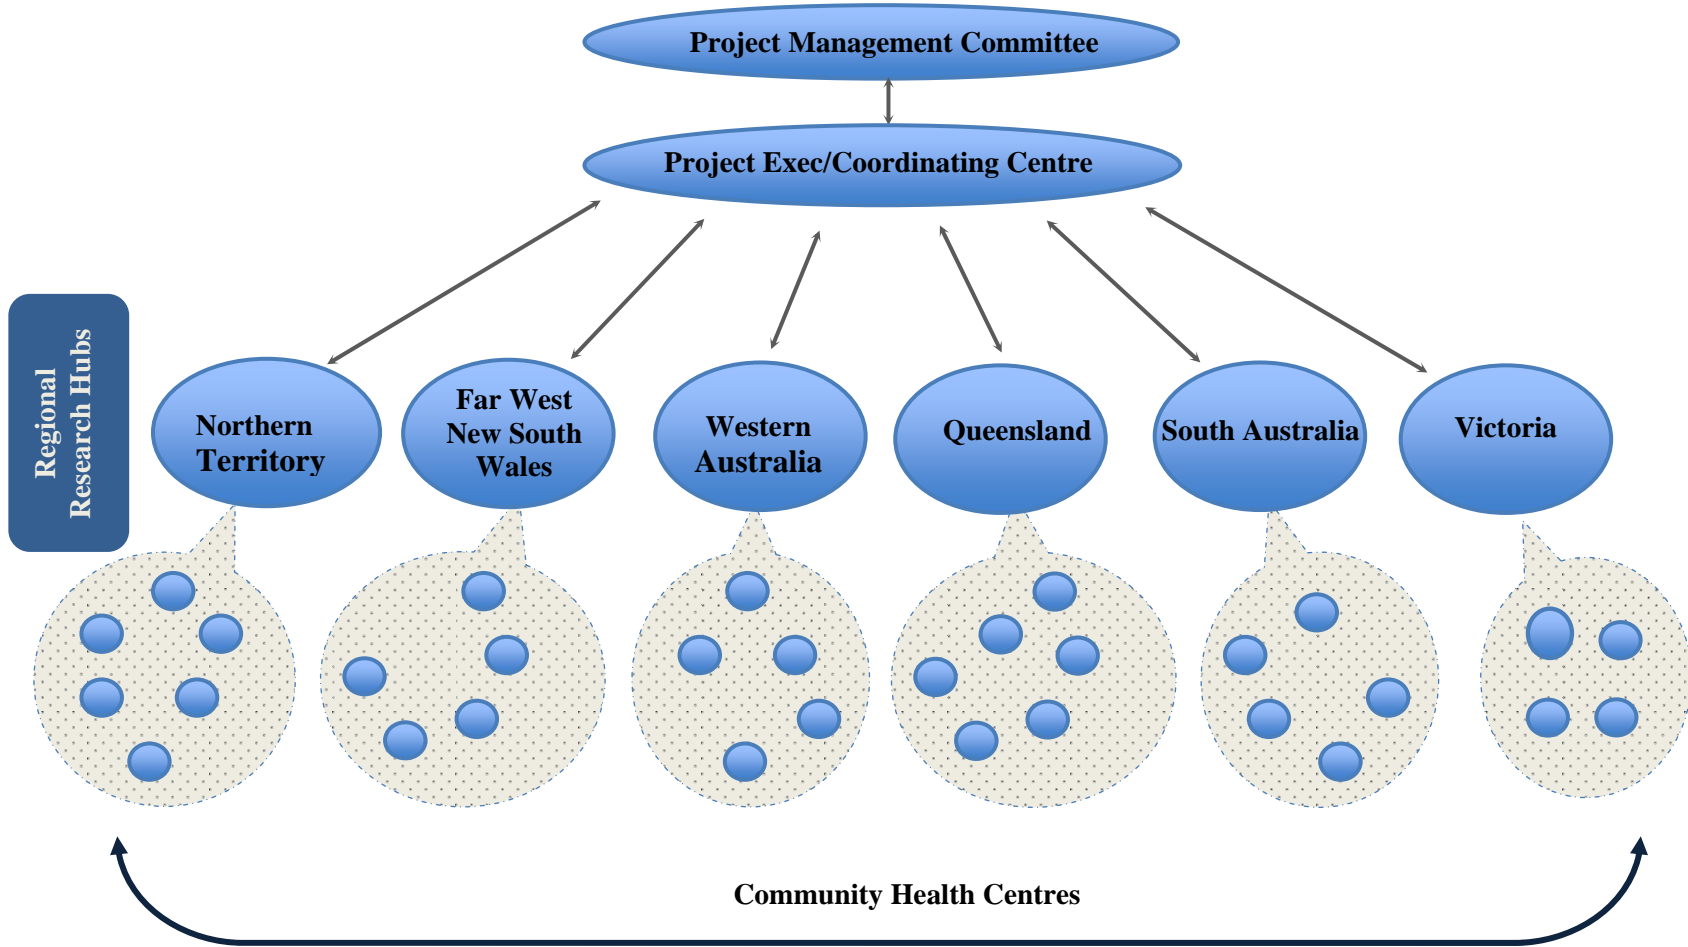

Supplement: MOESM4 [file 9527728]
